# Supplementary material for: Slow magnetic relaxation in a heteroleptic anilate-based DyIII metal–organic framework
Source: Royal Society of Chemistry journal article supplement (doi:10.1039/d4dt01979b), 2024-01-01
Supplement: d4dt01979b1.pdf [file d4dt01979b1.pdf]

# Slow Magnetic Relaxation in a Heteroleptic Anilate-based Dy<sup>III</sup> Metal-Organic Framework

Mariangela Oggianu,<sup>a</sup> Federica Bertolotti,<sup>b</sup> Fabio Manna,<sup>a,d</sup> Francesco Congiu,<sup>c</sup> Antonio Cappai,<sup>c</sup> Claudio Melis,<sup>c</sup> Giorgio Concas,<sup>c</sup> Narcis Avarvari,<sup>d</sup> Norberto Masciocchi<sup>b</sup> and Maria Laura Mercuri\*<sup>a</sup>

<sup>a</sup>Dipartimento di Scienze Chimiche e Geologiche, Università degli Studi di Cagliari, I-09042 Monserrato, Italy.

<sup>b</sup>Dipartimento di Scienza e Alta Tecnologia & To.Sca.Lab., Università dell'Insubria, via Valleggio 11, 22100 Como, Italy.

<sup>c</sup>Dipartimento di Fisica, Università degli Studi di Cagliari, S. P. Monserrato-Sestu km 0,700, I-09042 Monserrato (CA), Italy.

<sup>d</sup>Laboratoire MOLTECH-Anjou UMR 6200, UFR Sciences, CNRS, Université d'Angers, Bât. K, 2 Bd. Lavoisier, 49045 Angers, France.

# Summary

|                                                                 |    |
|-----------------------------------------------------------------|----|
| <b>1. Results and Discussion</b> .....                          | 3  |
| <b>1.1 Structural Characterization</b> .....                    | 3  |
| Figure S1. ....                                                 | 3  |
| Figure S2. ....                                                 | 3  |
| Table S1 .....                                                  | 4  |
| Table S2 .....                                                  | 4  |
| Table S3 .....                                                  | 5  |
| <b>1.2 Thermo-Gravimetric Analysis (TGA)</b> .....              | 6  |
| Figure S3 .....                                                 | 6  |
| <b>1.3 Fourier Transform Infrared Spectroscopy(FT-IR)</b> ..... | 7  |
| Figure S4 .....                                                 | 7  |
| <b>1.4 Computational Characterization</b> .....                 | 8  |
| Table S4. ....                                                  | 8  |
| <b>1.5 Magnetic Characterization</b> .....                      | 8  |
| Equation S1.....                                                | 8  |
| Equation S2.....                                                | 8  |
| Equation S3.....                                                | 8  |
| Figure S5 .....                                                 | 9  |
| Figure S6 .....                                                 | 9  |
| Figure S7 .....                                                 | 10 |
| Figure S8 .....                                                 | 10 |
| Figure S9 .....                                                 | 11 |
| Figure S10. ....                                                | 11 |
| Figure S11 .....                                                | 12 |
| Figure S12. ....                                                | 13 |
| Figure S14. ....                                                | 14 |
| Figure S15. ....                                                | 15 |
| Figure S16. ....                                                | 15 |
| Equation S4.....                                                | 16 |
| Equation S5.....                                                | 16 |
| Equation S6.....                                                | 16 |
| Table S5. ....                                                  | 16 |
| Figure S17 .....                                                | 17 |
| Figure S18. ....                                                | 18 |
| <b>2.0 References</b> .....                                     | 19 |

# 1. Results and Discussion

## 1.1 Structural Characterization

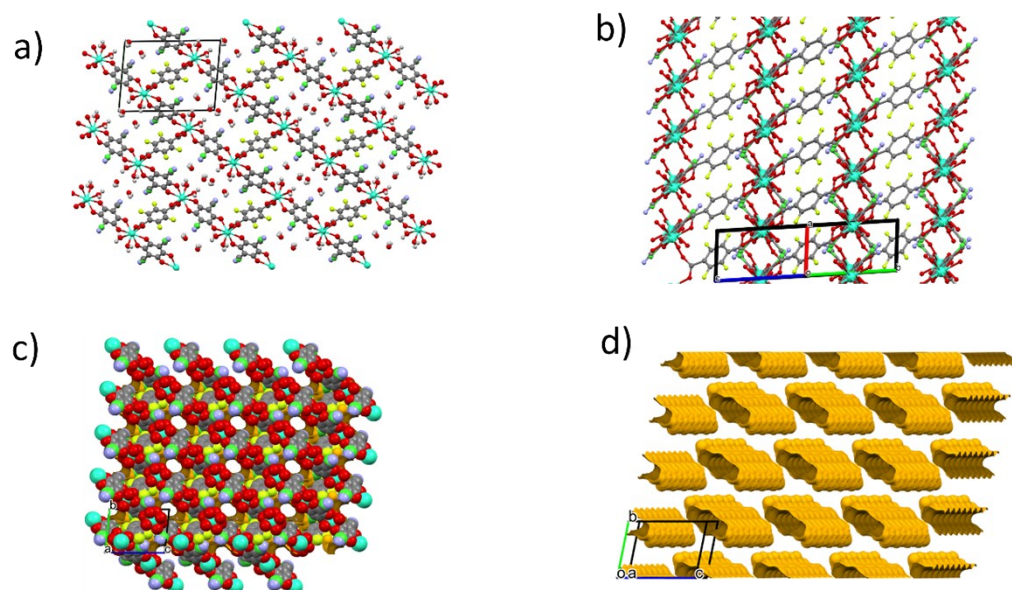

Figure S1. a) The crystal structure of **1** viewed down the *a* axis, in which the arrangement of water molecules in the channels can be seen; b) representation of the 1D chains of Tb<sup>III</sup> ions bridged by the F<sub>4</sub>BDC<sup>2-</sup> moieties; c) space-filling model of **1**, highlighting the voids generated by removal of non-coordinated water molecules; d) Mercury representation of the size/shape of the voids. Colour codes: C, grey; N, blue; O, red; F, yellow; Cl, green; Tb, cyan.

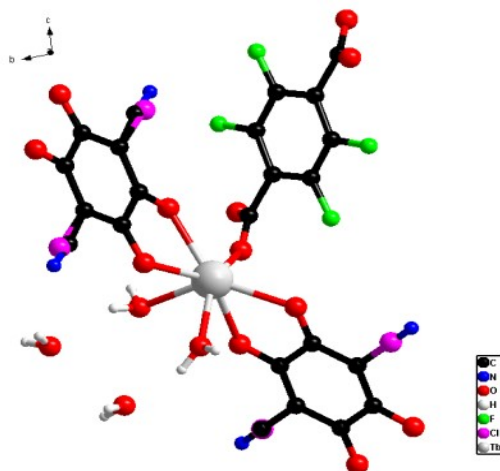

Figure S2. The coordination sphere around the Ln<sup>III</sup> ions (coordinates taken from the single-crystal structure model of **1**). Site occupancy factors for Cl1, Cl2, N1, N2, C4, C12 atoms = 0.5.

Table S1. Crystal data and structure refinement parameters for **1**.

|                                        |                                                                                                                             |
|----------------------------------------|-----------------------------------------------------------------------------------------------------------------------------|
| Empirical formula                      | C <sub>11</sub> H <sub>8</sub> ClF <sub>2</sub> NO <sub>10</sub> Tb                                                         |
| Formula weight, amu                    | 546.55                                                                                                                      |
| Temperature                            | 200.0(1) K                                                                                                                  |
| Wavelength                             | 1.54184 Å                                                                                                                   |
| Crystal system, space group            | Triclinic, <i>P</i> $\bar{1}$                                                                                               |
| Unit cell dimensions                   | a = 5.1017(3) Å $\alpha$ = 95.724(4) °<br>b = 10.7630(6) Å $\beta$ = 99.786(5) °<br>c = 14.8712(8) Å $\gamma$ = 90.157(5) ° |
| Cell volume                            | 800.52(8) Å <sup>3</sup>                                                                                                    |
| Z, Calculated density                  | 2, 2.267 Mg m <sup>-3</sup>                                                                                                 |
| Absorption coefficient                 | 24.020 mm <sup>-1</sup>                                                                                                     |
| F(000)                                 | 522                                                                                                                         |
| Crystal size                           | 0.13 x 0.03 x 0.03 mm – red needle                                                                                          |
| $\theta$ range for data collection     | 3.031 - 71.888 °                                                                                                            |
| Limiting indices                       | 6 ≤ h ≤ 6, -10 ≤ k ≤ 13, -18 ≤ l ≤ 18                                                                                       |
| Reflections collected / unique         | 6434 / 3081 [R(int) = 0.0566]                                                                                               |
| Completeness to $\theta = 71.00^\circ$ | 98.5 %                                                                                                                      |
| Absorption correction                  | Semi-empirical from equivalent                                                                                              |
| Max. and min. transmission             | 1.000 and 0.427                                                                                                             |
| Refinement method                      | Full-matrix least-squares on F <sup>2</sup>                                                                                 |
| Goodness-of-fit on F <sup>2</sup>      | 1.072                                                                                                                       |
| Final R indices [ $I > 2\sigma(I)$ ]   | R1 = 0.0489, wR2 = 0.1234 [2858 Fo]                                                                                         |
| R indices (all data)                   | R1 = 0.0527, wR2 = 0.1276                                                                                                   |
| Largest diff. peak and hole            | 1.952 and -1.323 e Å <sup>-3</sup>                                                                                          |

Table S2. Selected bond distances for **1** (Å). Esd's in parentheses.

|        |          |        |          |           |                                 |        |          |
|--------|----------|--------|----------|-----------|---------------------------------|--------|----------|
| Tb1-O1 | 2.463(5) | Tb1-O5 | 2.437(4) | Tb1...Tb1 | 5.1017(5) (carboxylate-bridged) |        |          |
| Tb1-O2 | 2.389(4) | Tb1-O6 | 2.443(4) | Tb1...Tb1 | 8.7448(6) (anilate-bridged)     |        |          |
| Tb1-O3 | 2.280(4) | Tb1-O7 | 2.365(4) | C1-O1     | 1.264(8)                        | C9-O5  | 1.249(9) |
| Tb1-O4 | 2.310(5) | Tb1-O8 | 2.383(5) | C2-O2     | 1.247(8)                        | C11-O6 | 1.265(7) |

Table S3. Synoptic collection of lattice metrics for compounds **1-3** and their known Yb and Er analogues.

| Compound                | CR <sup>a</sup> , Å | a, Å | b, Å  | c, Å  | $\alpha$ , ° | $\beta$ , ° | $\gamma$ , ° | V, Å <sup>3</sup> |
|-------------------------|---------------------|------|-------|-------|--------------|-------------|--------------|-------------------|
| <b>(Yb)<sup>1</sup></b> | 1.125               | 5.07 | 10.77 | 14.65 | 95.9         | 99.7        | 90.5         | 784               |
| <b>(Er)<sup>1</sup></b> | 1.144               | 5.11 | 10.78 | 14.73 | 95.8         | 99.7        | 90.5         | 795               |
| <b>3 (Ho)</b>           | 1.155               | 5.13 | 10.83 | 14.74 | 95.7         | 99.7        | 90.5         | 804               |
| <b>2 (Dy)</b>           | 1.167               | 5.15 | 10.82 | 14.80 | 95.7         | 99.7        | 90.3         | 808               |
| <b>1 (Tb)</b>           | 1.180               | 5.16 | 10.80 | 14.91 | 95.8         | 99.8        | 90.2         | 814               |

<sup>a</sup> Shannon's crystal radii.<sup>2</sup>

## 1.2 Thermo-Gravimetric Analysis (TGA)

TGA was performed on polycrystalline samples of **1**, **2** and **3** (Figure S3). The first weight loss occurring at 70 °C (about 3-4%) is due to the elimination of surface *physisorbed* moisture, while the loss at 80-100°C (about 6%) corresponds to the removal of *clathrated* water molecules from the cavities of the MOF structures discussed in the main text. Above 100 °C, **1**, **2** and **3** show an additional weight loss (of about 6–7%), attributed to the complete removal of the *coordinated* water molecules. Above 375 °C, all three compounds present a further and remarkable weight loss, due to material decomposition. Altogether, these results confirm the stoichiometry of the polycrystalline materials, which are in agreement with the water-content formulations presented in the main text from the single crystal analysis of compound **1**.

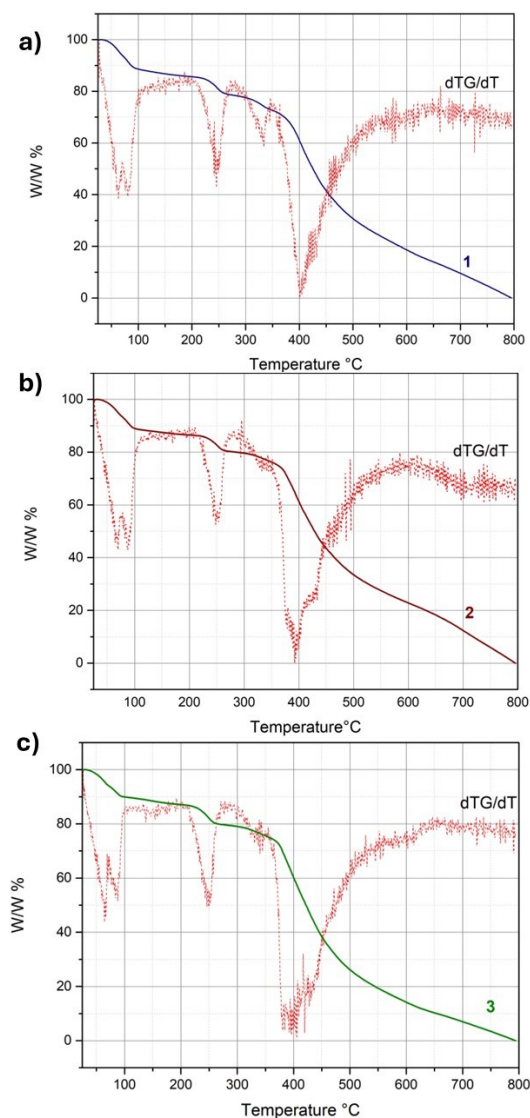

Figure S3. Thermograms of **1**, **2** and **3** in the 25–800°C range.

### 1.3 Fourier Transform Infrared Spectroscopy (FT-IR)

The FT-IR spectra of **1**, **2** and **3** were collected and compared with those of both **KHCICNAn** and **H<sub>2</sub>F<sub>4</sub>BDC** linkers. As shown in **Figure S4**, the two bands at 1780 cm<sup>-1</sup> and 1650 cm<sup>-1</sup> are assigned to the  $\nu(\text{C=O})$  stretching vibration mode for the uncoordinated C=O groups of **H<sub>2</sub>F<sub>4</sub>BDC** and **KHCICNAn**, respectively. As shown in **Figure S9b**, in **1**, **2** and **3** this band is downshifted to 1540-1520 cm<sup>-1</sup>, due to the C=O coordination to the metal ions. In the fingerprint region, the sharp band observed at 1030 cm<sup>-1</sup> in the FT-IR spectra of **1-3** can be assigned to the C-F stretching vibration which is red-shifted if compared to that of the pristine **H<sub>2</sub>F<sub>4</sub>BDC** linker.

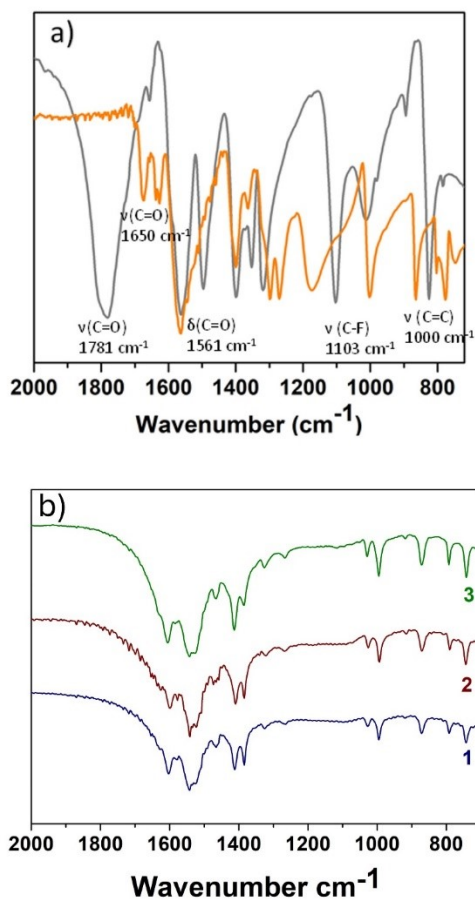

Figure S4. FT-IR spectra of: a) KHCICNAn (orange line), H<sub>2</sub>F<sub>4</sub>BDC (grey line) and b) **1** (red line), **2** (blue line) **3** (green line), in the 2000-700 cm<sup>-1</sup> region.

## 1.4 Computational Characterization

Table S4. Löwdin<sup>3,4</sup> charges of the oxygen atoms for the compound **2** (Dy), computed by DFT

| Atom | $q$ , electron charge units |
|------|-----------------------------|
| O1   | -0.363                      |
| O2   | -0.313                      |
| O3   | -0.333                      |
| O4   | -0.322                      |
| O5   | -0.310                      |
| O6   | -0.326                      |
| O7   | -0.561                      |
| O8   | -0.575                      |

## 1.5 Magnetic Characterization

Equation S1. Dy<sup>III</sup> susceptibility<sup>5</sup>

$$\chi_{Dy} = \frac{Ng^2\beta}{kT} \left( \frac{0.5e^{-\frac{0.25\Delta}{kT}} + 4.5e^{-\frac{2.25\Delta}{kT}} + 12.5e^{-\frac{6.25\Delta}{kT}} + 24.5e^{-\frac{12.25\Delta}{kT}} + \dots}{1 + 2e^{-\frac{\Delta}{kT}} + 2e^{-\frac{2\Delta}{kT}} + 2e^{-\frac{9\Delta}{kT}} + 2e^{-\frac{16\Delta}{kT}} + 2e^{-\frac{25\Delta}{kT}} + 2e^{-\frac{36\Delta}{kT}} + \dots} + \frac{40.5e^{-\frac{20.25\Delta}{kT}} + \dots}{1 + 2e^{-\frac{\Delta}{kT}} + 2e^{-\frac{2\Delta}{kT}} + \dots} \right)$$

Equation S2. Tb<sup>III</sup> susceptibility<sup>5</sup>

$$\chi_{Tb} = \frac{Ng^2\beta}{kT} \left( \frac{2e^{-\frac{\Delta}{kT}} + 4e^{-\frac{2\Delta}{kT}} + 18e^{-\frac{9\Delta}{kT}} + 32e^{-\frac{16\Delta}{kT}} + 50e^{-\frac{25\Delta}{kT}} + 72e^{-\frac{36\Delta}{kT}}}{1 + 2e^{-\frac{\Delta}{kT}} + 2e^{-\frac{2\Delta}{kT}} + 2e^{-\frac{9\Delta}{kT}} + 2e^{-\frac{16\Delta}{kT}} + 2e^{-\frac{25\Delta}{kT}} + 2e^{-\frac{36\Delta}{kT}} + \dots} \right)$$

Equation S3. Ho<sup>III</sup> susceptibility<sup>5</sup>

$$\chi_{Ho} = \frac{Ng^2\beta}{kT} \left( \frac{2e^{-\frac{\Delta}{kT}} + 8e^{-\frac{2\Delta}{kT}} + 18e^{-\frac{9\Delta}{kT}} + 32e^{-\frac{16\Delta}{kT}} + 50e^{-\frac{25\Delta}{kT}} + 72e^{-\frac{36\Delta}{kT}} + 98e^{-\frac{49\Delta}{kT}} + 128e^{-\frac{64\Delta}{kT}}}{1 + 2e^{-\frac{\Delta}{kT}} + 2e^{-\frac{4\Delta}{kT}} + 2e^{-\frac{9\Delta}{kT}} + 2e^{-\frac{16\Delta}{kT}} + 2e^{-\frac{25\Delta}{kT}} + 2e^{-\frac{36\Delta}{kT}} + 2e^{-\frac{49\Delta}{kT}} + 2e^{-\frac{64\Delta}{kT}} + \dots} \right)$$



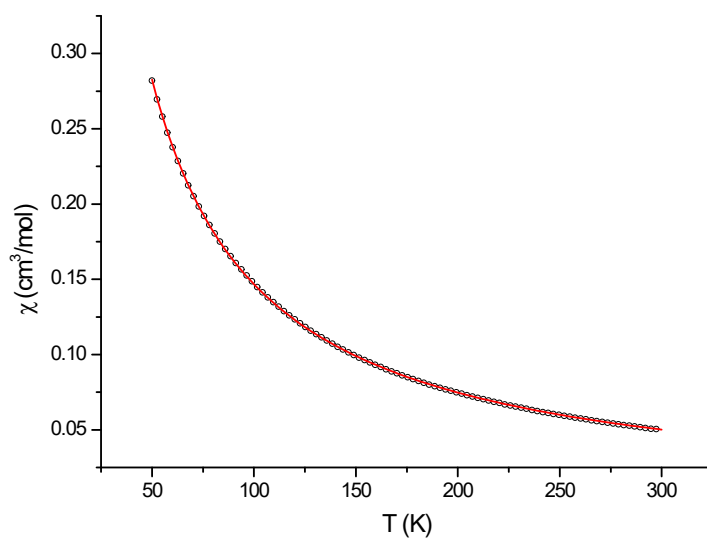

Figure S5. Molar susceptibility vs. temperature, with applied field of 1000 Oe, of compound **2** (Dy): experimental data (black circles) and fitting curve (red line).

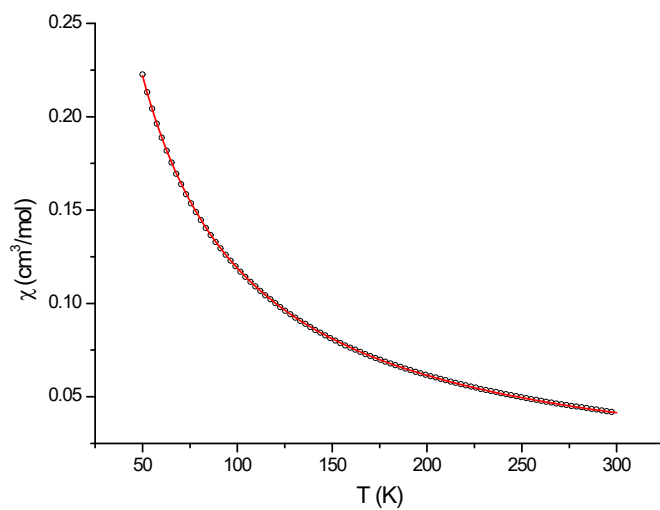

Figure S6. Molar susceptibility vs. temperature, with applied field of 1000 Oe, of compound **1** (Tb): experimental data (black circles) and fitting curve (red line).

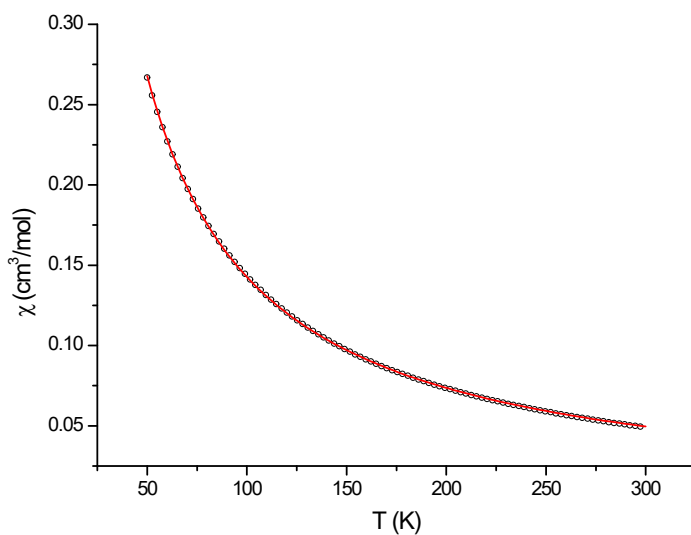

Figure S7. Molar susceptibility vs. temperature, with applied field of 1000 Oe, of compound **3** (Ho): experimental data (black circles) and fitting curve (red line).

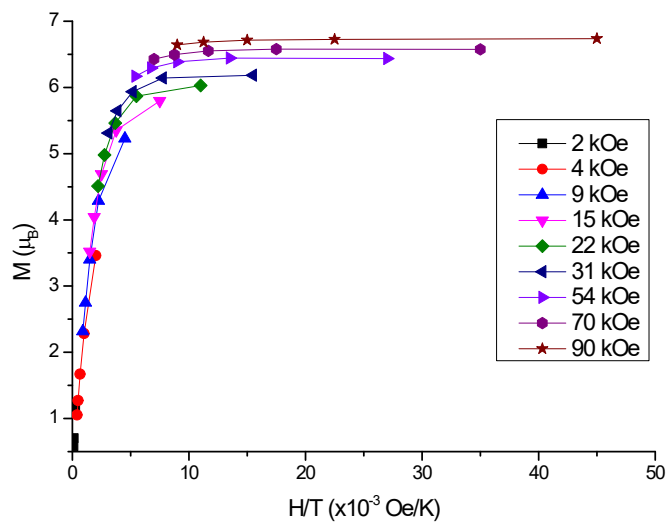

Figure S8. Magnetization (in Bohr magnetons) vs. the field/temperature ratio of compound **2** (Dy); each curve represents the susceptibility for a given field at temperatures of 2 K, 4 K, 6 K, 8 K and 10 K.

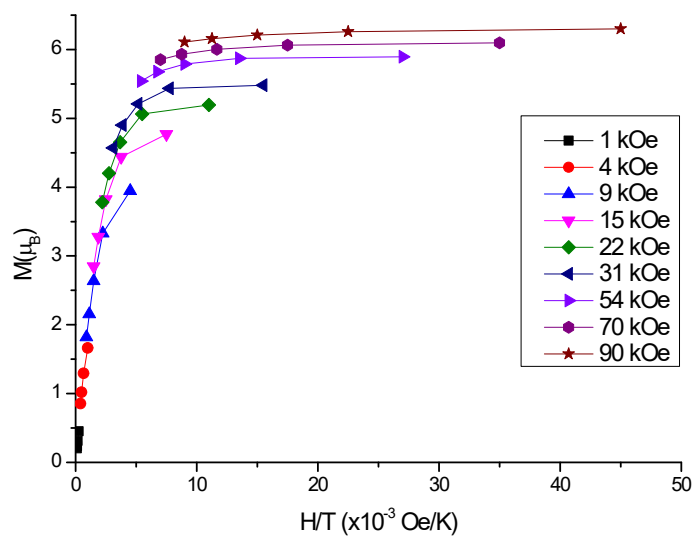

Figure S9. Magnetization (in Bohr's magnetons) vs. the field/temperature ratio of compound **1** (Tb); each curve represents the susceptibility for a given field at temperatures of 2 K, 4 K, 6 K, 8 K and 10 K.

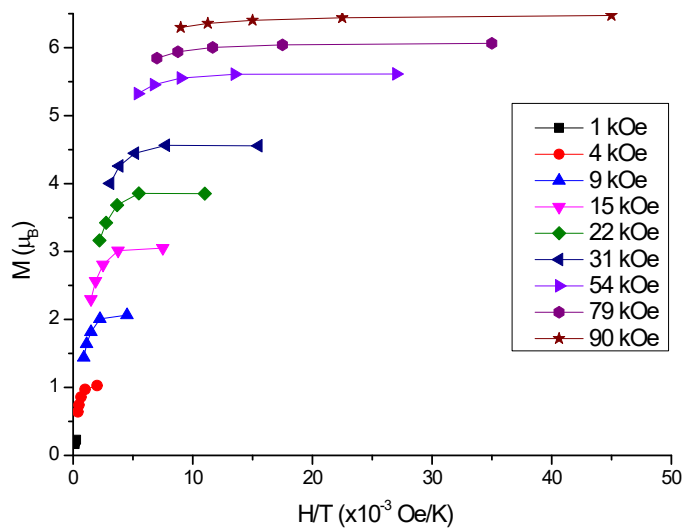

Figure S10. Magnetization (in Bohr's magnetons) vs. the field/temperature ratio of compound **3** (Ho); each curve represents the susceptibility for a given field at temperatures of 2 K, 4 K, 6 K, 8 K and 10 K.

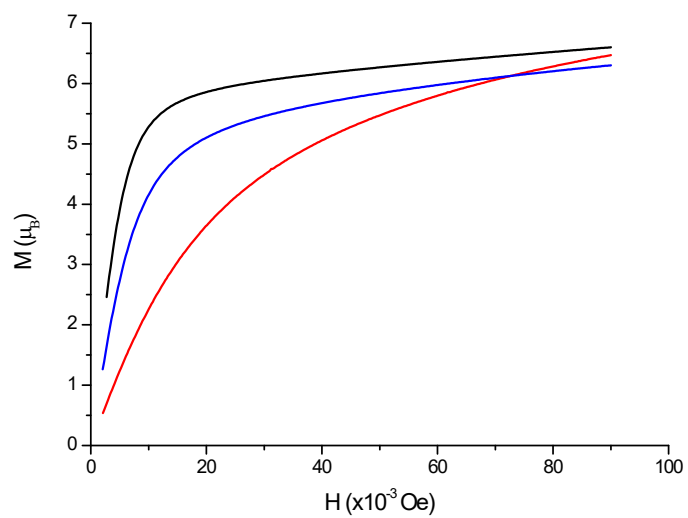

Figure S11. Magnetization at 2 K (in Bohr's magnetons) vs. applied field of compounds **1** (Tb, blue line), **2** (Dy, black) and **3** (Ho, red).

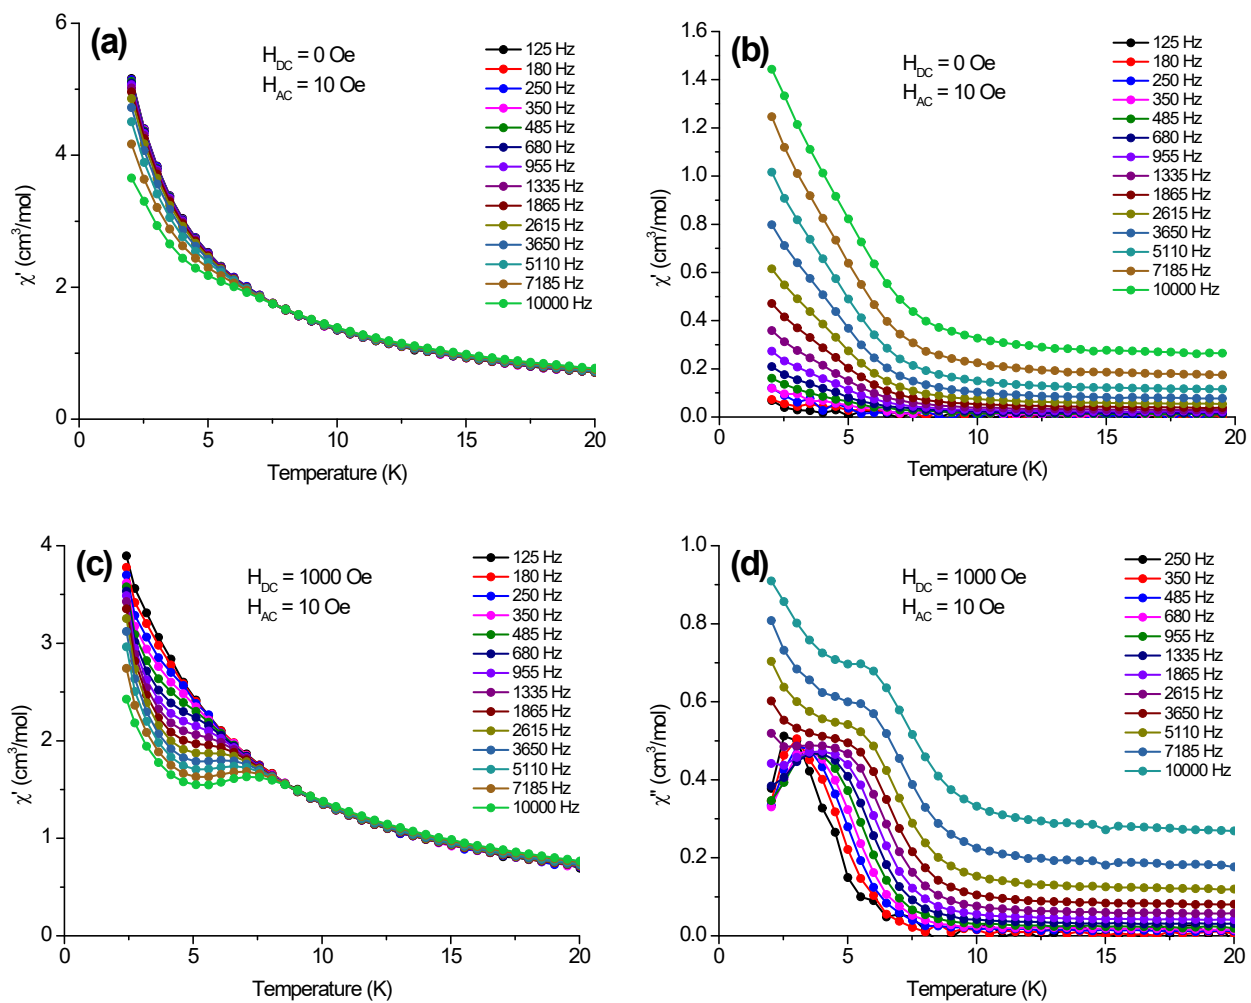

Figure S12. Temperature dependence of the in phase  $\chi'$  (left) and out of phase  $\chi''$  (right) components for compound **2** (Dy) measured under  $H_{DC} = 0$  Oe (a,b) and 1000 Oe (c,d).

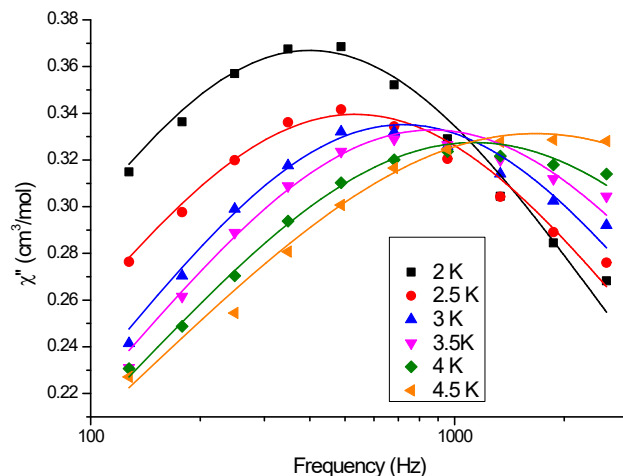

**Figure S13.** Frequency dependence of the out of phase component of the susceptibility for compound **2** (Dy) measured under  $H_{DC} = 5000$  Oe. Experimental data (symbols) and best fitting curves to the generalized Debye model are shown (imaginary part of Eq. S5 below).

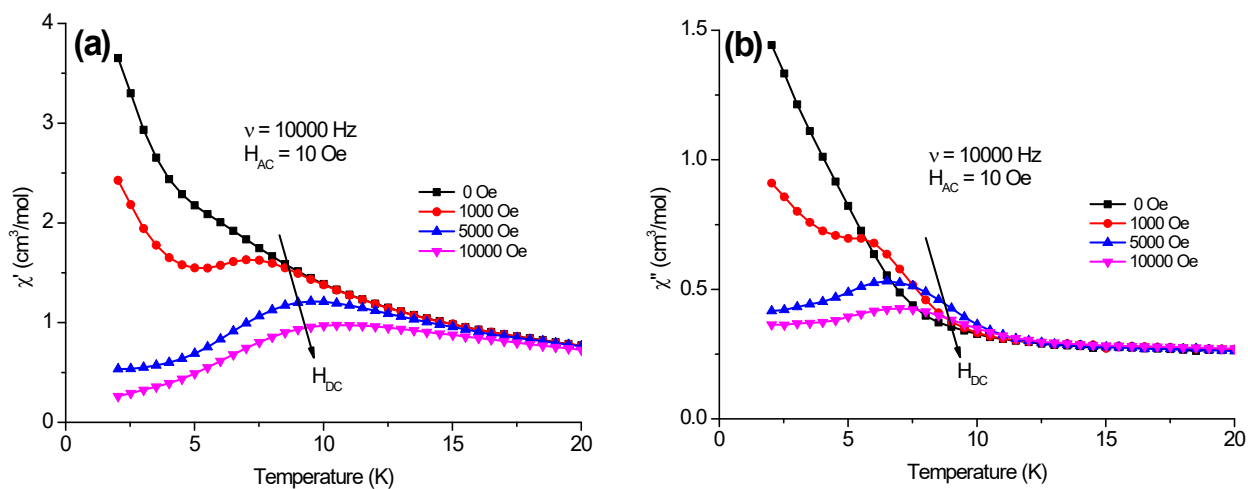

**Figure S14.** Temperature dependence of the in phase  $\chi'$  (a) and out of phase  $\chi''$  (b) components for compound **2** (Dy) measured at  $\nu = 10000$  Hz with  $H_{AC} = 10$  Oe and different values of  $H_{DC}$ .

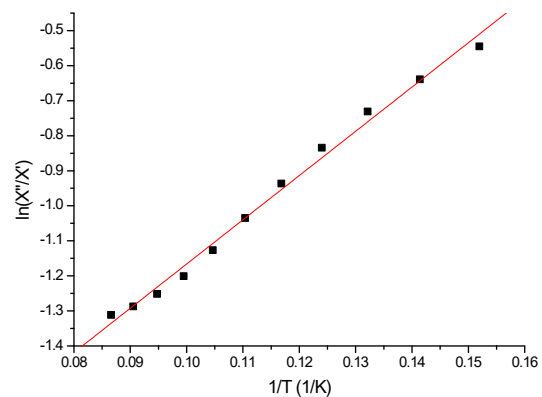

Figure S15. Linear fit for the magnetic relaxation process according to equation S4 for compound **2** (Dy). Black squares represent experimental values, the red line is the fitting curve.

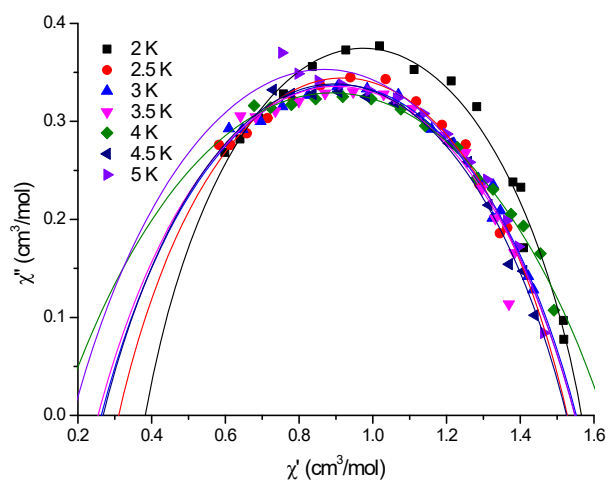

Figure S16. The Cole-Cole plot for compound **2** (Dy). The solid lines represent the best fit with equation S6.

Equation S4.  $\chi''/\chi'$  according to the Debye model<sup>6</sup>

$$\ln \frac{\chi''}{\chi'} = \ln(2\pi\nu\tau_0) + \frac{U_{eff}}{k_B T}$$

Equation S5.  $\chi(\omega)$  according to the generalized Debye model<sup>7</sup>

$$\chi(\omega) = \chi_S + \frac{\chi_T - \chi_S}{1 - (i\omega\tau)^{1-\alpha}}$$

Equation S6. Fit of the Cole-Cole plots according to the generalized Debye model<sup>7</sup>

$$\chi'' = -\left(\frac{\chi_T - \chi_S}{2} \tan \frac{\pi\alpha}{2}\right) + \sqrt{\left(\frac{\chi_T - \chi_S}{2} \tan \frac{\pi\alpha}{2}\right)^2 + (\chi' - \chi_S)(\chi_T - \chi')}$$

Table S5. Parameters obtained by fitting the Cole-Cole plots of AC susceptibility of compound **2** measured with  $H_{DC} = 5000$  Oe.

| T<br>(K) | $\chi_S$<br>(cm <sup>3</sup> /mol) | $\chi_T$<br>(cm <sup>3</sup> /mol) | $\alpha$ |
|----------|------------------------------------|------------------------------------|----------|
| 2.0      | 0.38(2)                            | 1.57(1)                            | 0.28(2)  |
| 2.5      | 0.31(2)                            | 1.53(2)                            | 0.34(2)  |
| 3.0      | 0.26(3)                            | 1.55(1)                            | 0.39(2)  |
| 3.5      | 0.25(3)                            | 1.55(2)                            | 0.39(2)  |
| 4.0      | 0.15(4)                            | 1.63(1)                            | 0.47(2)  |
| 4.5      | 0.27(4)                            | 1.53(1)                            | 0.37(2)  |
| 5.0      | 0.19(8)                            | 1.55(2)                            | 0.39(3)  |



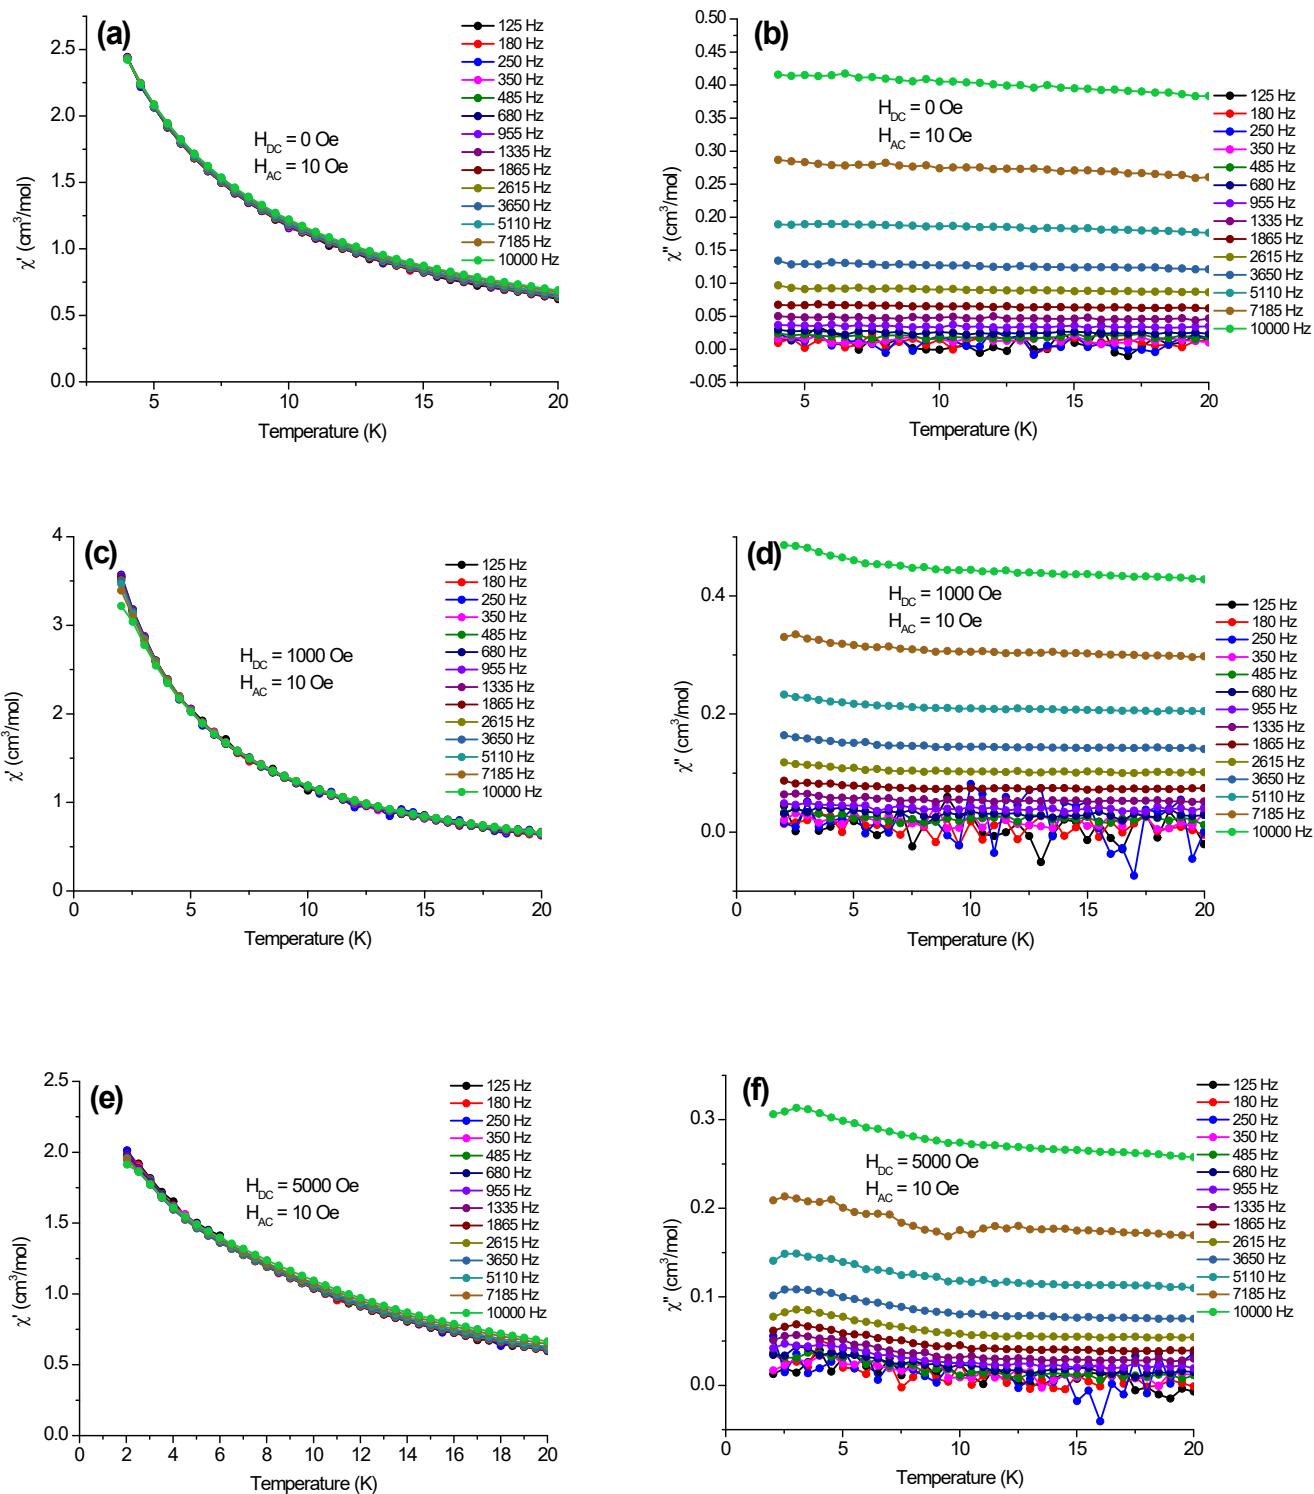

Figure S17. Temperature dependence of the in phase  $\chi'$  (left) and out of phase  $\chi''$  (right) components for compound 1 (Tb) measured under  $H_{DC} = 0$  Oe (a, b), 1000 Oe (c, d) and 5000 Oe (e, f).

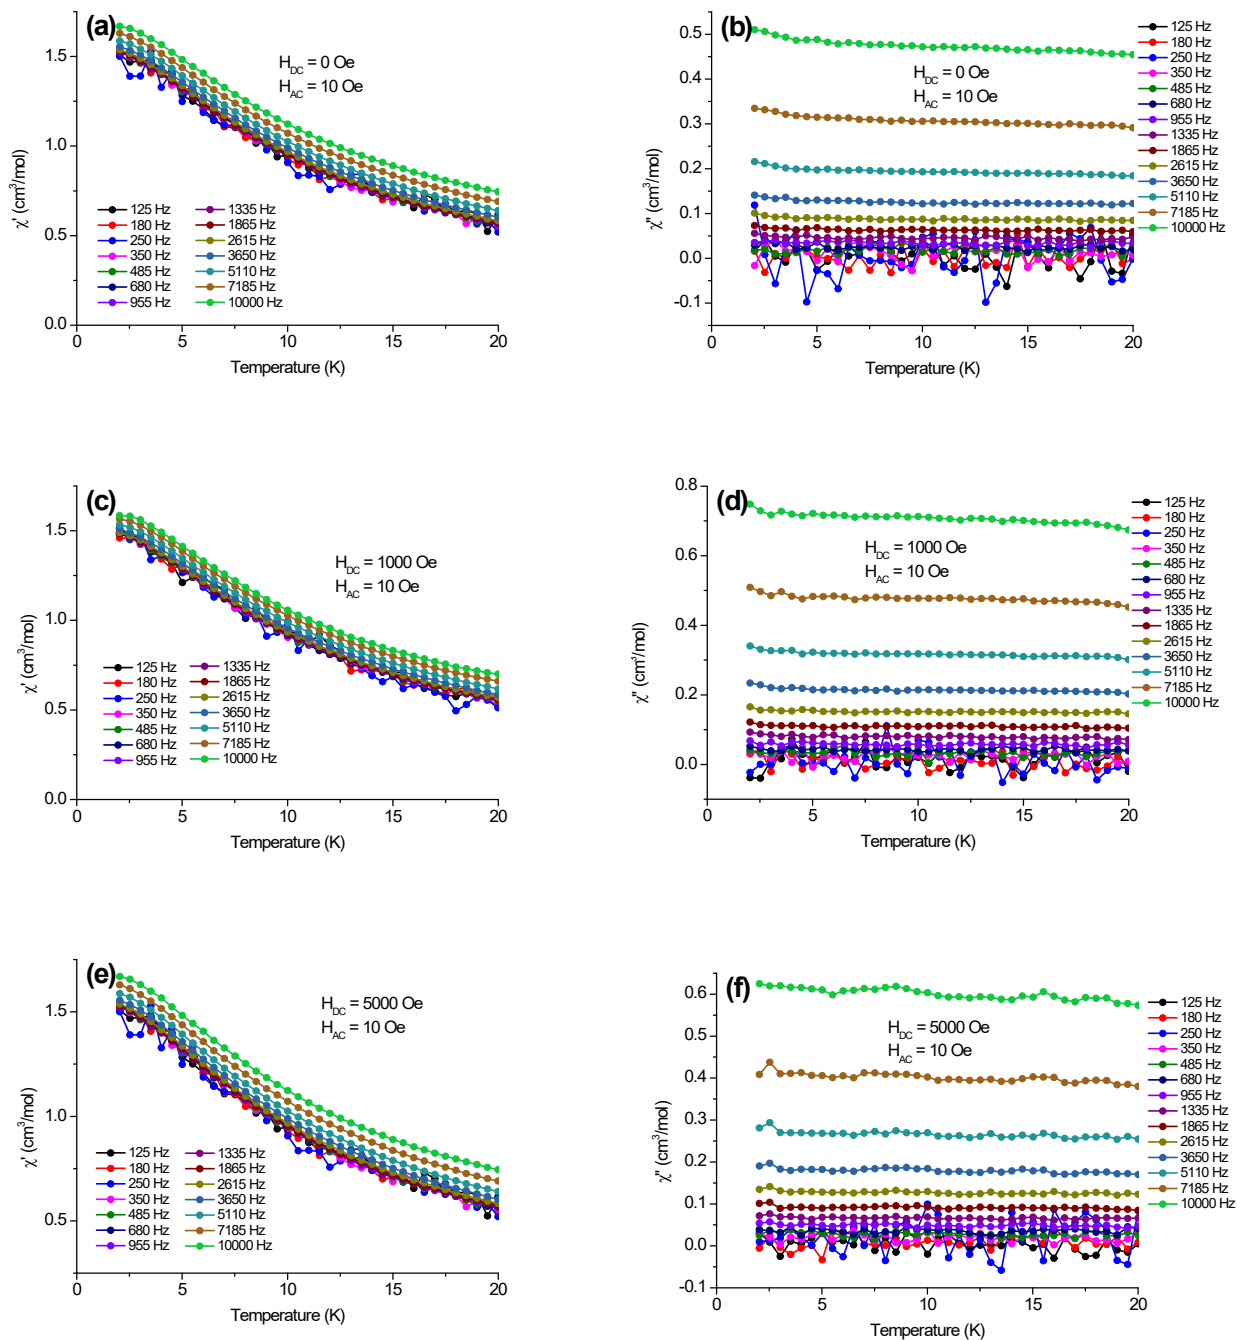

Figure S18. Temperature dependence of the in phase  $\chi'$  (left) and out of phase  $\chi''$  (right) components for compound 3 (Ho) measured under  $H_{DC} = 0$  Oe (a, b), 1000 Oe (c, d) and 5000 Oe (e, f).

## 2.0 References

- 1 M. Oggianu, F. Manna, S. Ashoka Sahadevan, N. Avarvari, A. Abhervé and M. L. Mercuri, *Crystals*, 2022, **12**, 763.
- 2 R. D. Shannon, *Acta Crystallogr. Sect. A*, 1976, **32**, 751–767.
- 3 N. S. O. A. Szabo, *Modern Quantum Chemistry*, 1996.
- 4 P.-O. Löwdin, *J. Chem. Phys.*, 1950, **18**, 365–375.
- 5 C.-H. Zhan, F. Wang, Y. Kang and J. Zhang, *Inorg. Chem.*, 2012, **51**, 523–530.
- 6 E. Echenique-Errandonea, R. F. Mendes, F. Figueira, D. Choquesillo-Lazarte, G. Beobide, J. Cepeda, D. Ananias, A. Rodríguez-Diéguez, F. A. Almeida Paz and J. M. Seco, *Inorg. Chem.*, 2022, **61**, 12977–12990.
- 7 C. V Topping and S. J. Blundell, *J. Phys. Condens. Matter*, 2019, **31**, 013001.
